# Supplementary material for: Comparing the Effect of TGF-β Receptor Inhibition on Human Perivascular Mesenchymal Stromal Cells Derived from Endometrium, Bone Marrow and Adipose Tissues
Source: PubMed Central journal article supplement (PMC7712261; doi:10.3390/jpm10040261), 2020-12-01
Supplement: jpm-10-00261-s001.pdf [file jpm-10-00261-s001.pdf]

# Comparing the effect of TGF- $\beta$ receptor inhibition on human mesenchymal stem/stromal cells derived from endometrium, bone marrow and adipose tissues

Shanti Gurung <sup>1,2\*</sup>, Daniela Ulrich <sup>1,6</sup>, Marian Sturm <sup>3,4</sup>, Anna Rosamilia <sup>2,5</sup>, Jerome A. Werkmeister <sup>1,2</sup> and Caroline E. Gargett <sup>1,2</sup>

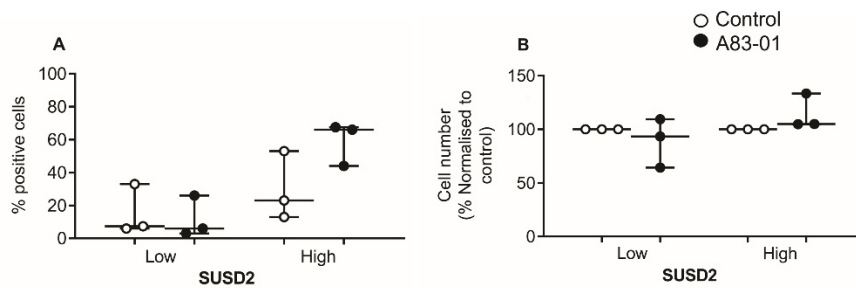

**Figure S1. Differences between bmMSC donors. (A)** Graph showing two groups of bmMSCs with and without effect of A83-01 treatment on % SUSD2<sup>+</sup> cells. **(B)** Graph showing no difference in the number of cells following A83-01 treatment in the two groups of donor cells from A. Plots are median for n=3 biological samples per treatment group.
